# Supplementary material for: Research Advances in Stem Cell Therapy for Erectile Dysfunction
Source: Springer Nature journal article supplement (doi:10.1007/s40259-024-00650-9), 2024-03-23
Supplement: 40259_2024_650_MOESM1_ESM.pdf [file 40259_2024_650_MOESM1_ESM.pdf]

Wei Wang<sup>1</sup>, Ying Liu<sup>3</sup>, Zuo-bin Zhu<sup>4</sup>, Kun Pang<sup>2</sup>, Jing-kai Wang<sup>5</sup>, Jun Gu<sup>7</sup>, Zhen-bei Li<sup>6</sup>, Jian Wang<sup>2</sup>, Zhen-duo Shi<sup>2\*</sup> and Cong-hui Han<sup>1,2\*</sup>

1 School of Medicine, Southeast University, Nanjing, China,

2 Department of Urology, Xuzhou Central Hospital, Xuzhou, China,

3 Department of Central Laboratory, Xuzhou Central Hospital, Xuzhou, China,

4 Xuzhou Engineering Research Center of Medical Genetics and Transformation, Key Laboratory of Genetic Foundation and Clinical Application, Department of Genetics, Xuzhou Medical University, Xuzhou, China

5 Graduate School, Jiangsu University, Zhenjiang, China

6 Department of Reproductive Medicine, Xuzhou Central Hospital, Xuzhou, China,

7 Suzhou Medical College of Soochow University, Suzhou, China.

Correspondence: Cong-hui Han Email: [hanchdoctor@st.btbu.edu.cn](mailto:hanchdoctor@st.btbu.edu.cn) Tel:+8613813461893

Zhen-duo Shi Email: [bujiniao2008@qq.com](mailto:bujiniao2008@qq.com) Tel:+8618012018198

Declarations:

Funding: No funding received for preparation of this manuscript.

Competing interests: The authors declare that they have no competing interests.

Supplementary table 1 Summarizes stem cell studies aimed at ED in cavernous nerve injury

| Author (year)                          | animal model      | stem cell type                                 | Transplant method              | transfection               | Follow-up time         | number            | Erectile function | Histological\ molecular                                  |
|----------------------------------------|-------------------|------------------------------------------------|--------------------------------|----------------------------|------------------------|-------------------|-------------------|----------------------------------------------------------|
| Bochinski et al. <sup>[1]</sup> (2004) | CNI rat           | Neuronal ESC labeled with GFP                  | ICI or MPG                     | BDNF                       | 3 month                | 5x10 <sup>3</sup> | CNS               | NOS,tyrosine hydroxylase,NF                              |
| Kim et al. <sup>[2]</sup> (2006)       | CNI rat           | MDSCs                                          | ICI                            | lacZ                       | 2 and 4 weeks          | 1x10 <sup>6</sup> | CNS               | positively stained with PGP 9.5, lacZ                    |
| Fall et al. <sup>[3]</sup> (2009)      | BCNA rat          | BMMNC labeled with PKH-26                      | ICI                            | -                          | 3 and 5 weeks          | 1x10 <sup>7</sup> | CNS               | nNOS,eNOS,cavernosal cellular                            |
| Albersen et al. <sup>[4]</sup> (2010)  | CNI rat           | ADSCs labeled with Edu and ADSC-derived lysate | ICI                            | -                          | 4 weeks                | 1x10 <sup>6</sup> | CNS               | nNOS,a-SMA,reticular subtype III collagen                |
| Kendirci et al. <sup>[5]</sup> (2010)  | CNI rat           | multipotent stromal cells                      | ICI                            | p75 derived GFP transgenic | 4 weeks                | 5x10 <sup>5</sup> | CNS               | VEGF,NGF,BDNF,FGF,IGF                                    |
| Lin et al. <sup>[6]</sup> (2011)       | CNI rat           | ADSCs labeled with Edu                         | ICI                            | -                          | 2 and 7 days           | 1x10 <sup>6</sup> | -                 | cell index                                               |
| Lin et al. <sup>[7]</sup> (2011)       | CNI rat           | ADSCs labeled with Edu                         | ICI                            | -                          | 3 months               | -                 | CNS               | S100,nNOS                                                |
| Woo et al. <sup>[8]</sup> (2011)       | CNI rat           | MDSCs labeled with PKH-26                      | ICI                            | -                          | 4 weeks                | 1x10 <sup>6</sup> | CNS               | cGMP level                                               |
| Fandel et al. <sup>[9]</sup> (2012)    | CNI rat           | ADSCs labeled with Edu                         | ICI or around the dorsal nerve | -                          | 1,3,7 days and 4 weeks | 2x10 <sup>6</sup> | CNS               | nNOS,SDF-1                                               |
| SJ Kim et al. <sup>[10]</sup> (2012)   | CNI rat           | BMSCs                                          | MPG                            | -                          | 4 weeks                | 1x10 <sup>6</sup> | CNS               | nNOS,eNOS                                                |
| SJ Kim et al. <sup>[11]</sup> (2012)   | CNI rat           | BMSCs labeled with PKH-26                      | MPG                            | BDNF                       | 4 weeks                | 1x10 <sup>6</sup> | CNS               | nNOS,eNOS                                                |
| Kovanecz et al. <sup>[12]</sup> (2012) | CNI and aging rat | MDSCs                                          | -                              | Oral sildenafil            | 42 days                | 1x10 <sup>6</sup> | CNS               | Collagen,α-SMA,nNOS,NF-70,Calponin 1,SHP-2,BAX,BDNF,PDE5 |

|                                                  |         |                                     |                                 |                     |                         |                       |     |                                                                             |
|--------------------------------------------------|---------|-------------------------------------|---------------------------------|---------------------|-------------------------|-----------------------|-----|-----------------------------------------------------------------------------|
| Piao et al. <sup>[13]</sup> (2012)               | CNI rat | ADSCs labeled with PKH-26           | around the cavernous nerve      | BDNF                | 4 weeks                 | 1x10 <sup>6</sup>     | CNS | nNOS,eNOS,cGMP                                                              |
| Qiu et al. <sup>[14]</sup> (2012)                | CNI rat | ADSCs labeled with Edu              | tail-vein;                      | -                   | 17 weeks                | 1x10 <sup>6</sup>     | CNS | nNOS, $\alpha$ -SMA,vWF,S-100                                               |
| Qiu et al. <sup>[15]</sup> (2012)                | CNI rat | ADSCs derived SVF                   | ICI                             | -                   | 12 weeks                | 2x10 <sup>6</sup>     | CNS | nNOS,NF,Smooth muscle                                                       |
| Jeong et al. <sup>[16]</sup> (2013)              | CNI rat | ADSCs                               | around the cavernous nerve      | BDNF; Oral udenafil | 4 weeks                 | 1x10 <sup>6</sup>     | CNS | nNOS,VEGF,SMA,cGMP                                                          |
| You et al. <sup>[17]</sup> (2013)                | CNI rat | ADSCs labeled with Cell STALKER     | PPI or ICI                      | -                   | 4 weeks                 | 1x10 <sup>6</sup>     | CNS | nNOS, $\alpha$ -SMA, $\beta$ -actin                                         |
| You et al. <sup>[18]</sup> (2013)                | CNI rat | BMSCs labeled with Cell STALKER     | PPI or ICI                      | -                   | 4 weeks                 | 1x10 <sup>6</sup>     | CNS | nNOS                                                                        |
| IG Kim et al. <sup>[19]</sup> (2013)             | CNI rat | ADSCs labeled with PKH-26           | around the cavernous nerve      | NGF                 | 4 weeks                 | 1x10 <sup>6</sup>     | CNS | eNOS, $\alpha$ -SMA                                                         |
| Choi et al. <sup>[20]</sup> (2013)               | CNI rat | BMSCs and HTSCs labeled with CM-Dil | PPI                             | -                   | 4 weeks                 | 1x10 <sup>7</sup>     | CNS | Stem-121 <sup>TM</sup> , $\beta$ -tubulin class III                         |
| Ying et al. <sup>[21]</sup> (2013)               | CNI rat | ADSCs                               | ICI                             | -                   | 3 months                | 1x10 <sup>6</sup>     | CNS | nNOS, $\beta$ -actin                                                        |
| Ying et al. <sup>[22]</sup> (2014)               | CNI rat | ADSCs autologous vein graft         | -                               | -                   | 3 months                | 1x10 <sup>6</sup>     | CNS | nNOS                                                                        |
| Miyamoto et al. <sup>[23]</sup> (2014)           | CNI rat | endothelial progenitor cells        | around the cavernous nerve      | CD133+ cells        | 4days and 12 weeks      | 1x10 <sup>4</sup>     | CNS | nNOS,vWF, $\alpha$ -SMA,HNA,NGF,VEGF                                        |
| Mangir et al. <sup>[24]</sup> (2014)             | CNI rat | ADSCs                               | ICI                             | -                   | 4 weeks                 | 1x10 <sup>5</sup>     | CNS | nNOS                                                                        |
| Lee et al. <sup>[25]</sup> (2014)                | CNI rat | hADSCs labeled with PKH-26          | around the cavernous nerve      | BDNF,bFGF           | 4 weeks                 | 1x10 <sup>6</sup>     | CNS | bFGF,nNOS, $\beta$ -III tubulin; $\alpha$ -SMA; $\beta$ -actin;cGMP level   |
| Ryu et al. <sup>[26]</sup> (2014)                | CNI rat | BMSCs labeled with PKH-26           | ICI + IPI                       | -                   | 2 weeks                 | 3 x 10 <sup>5</sup>   | CNS | PECAM-1,phosphohistone H3, $\alpha$ -actin,nNOS,NF, $\beta$ -actin          |
| Bae et al. <sup>[27]</sup> (2014)                | CNI rat | MSC                                 | ICI                             | -                   | 4 weeks                 | 1x10 <sup>6</sup>     | CNS | bFGF,F-actin,cGMP level                                                     |
| Xu et al. <sup>[28]</sup> (2014)                 | CNI rat | ADSCs labeled with EdU              | ICI                             | -                   | 1, 3 ,7 ,14 and 28 days | 2x 10 <sup>6</sup>    | CNS | nNOS,RECA-1, $\alpha$ -SMA                                                  |
| Yang et al. <sup>[29]</sup> (2015)               | CNI rat | EdU-labeled ADSC                    | ICI                             | -                   | 1 and 4 week            | 1x10 <sup>6</sup>     | CNS | NGF,VEGF,Neurturin,nNOS                                                     |
| Takayanagi et al. <sup>[30]</sup> (2015)         | CNI rat | BMSCs labeled with PKH-26           | right external jugular vein     | -                   | 1 hour and 2 weeks      | 1x10 <sup>6</sup>     | CNS | GDNF,neurturin                                                              |
| You et al. <sup>[31]</sup> (2015)                | CNI rat | SVF and ADSCs labeled with PKH-26   | ICI                             | -                   | 4 weeks                 | 1x10 <sup>6</sup>     | CNS | $\alpha$ -SMA,eNOS,vWF,nNOS                                                 |
| Zhu et al. <sup>[32]</sup> (2015)                | CNI rat | HUCBMSCs                            | ICI                             | -                   | 1,3,7,28 days           | 2x10 <sup>6</sup>     | CNS | nNOS, $\alpha$ -SMA                                                         |
| Chen et al. <sup>[33]</sup> (2016)               | CNI rat | ADSCs labeled with Edu              | ICI                             | -                   | 2,7 and 14days          | 1 x 10 <sup>6</sup>   | CNS | nNOS,S100,PEDF,Akt,eNOS                                                     |
| Jeon et al. <sup>[34]</sup> (2016)               | CNI rat | ADSCs labeled with CM-Dil           | around CNI                      | -                   | 4 weeks                 | 1 x 10 <sup>6</sup>   | CNS | $\beta$ -III tubulin, $\alpha$ -SMA,VEGF,nNOS,eNOS,cGMP levels              |
| Yang et al. <sup>[35]</sup> (2016)               | CNI rat | USCs                                | ICI                             | PEDF                | 4 weeks                 | 1x10 <sup>6</sup>     | CNS | nNOS, CD31,eNOS, muscle to collagen ratio,NF,S100, Nestin, TGF- $\beta$     |
| Lin et al. <sup>[36]</sup> (2016)                | CNI rat | ADSCs                               | ICI and nanotechnology approach | -                   | 1,3,5 and 9 days        | 1 x 10 <sup>6</sup>   | CNS | $\alpha$ -SMA,PECAM-1                                                       |
| Martínez-Salamanca et al. <sup>[37]</sup> (2016) | CNI rat | BMSCs                               | ICI                             | -                   | 4 weeks                 | 1 x 10 <sup>6</sup>   | CNS | NO,fibrosis                                                                 |
| Wang et al. <sup>[38]</sup> (2018)               | CNI rat | BMSCs                               | ICI                             | -                   | 0, 2, 4 and 7 days      | 4x10 <sup>5</sup>     | CNS | vWF,VE-cadherin,eNOS                                                        |
| Wu et al. <sup>[39]</sup> (2018)                 | CNI rat | ADSCs                               | ICI and nanotechnology approach | -                   | 0, 1, and 3 days        | 2 x 10 <sup>5</sup>   | CNS | $\alpha$ -SMA, $\beta$ III tubulin,CD31                                     |
| Zheng et al. <sup>[40]</sup> (2018)              | CNI rat | ADSCs                               | ICI                             | miR-34a             | 4 weeks                 | 1 x 10 <sup>6</sup>   | CNS | S100 $\beta$ ,GFAP,P75                                                      |
| Matsuda et al. <sup>[41]</sup> (2018)            | CNI rat | BMSCs                               | CVI                             | -                   | 4 weeks                 | 1 x 10 <sup>6</sup>   | CNS | smooth muscle-to-collagen ratios                                            |
| Fang et al. <sup>[42]</sup> (2018)               | CNI rat | BMSCs+EPCs                          | ICI                             | -                   | 2 weeks                 | 1 x 10 <sup>6</sup>   | CNS | PECAM-1, $\alpha$ -actin,caspase-3,nNOS,MBP,S100 $\beta$                    |
| Ying et al. <sup>[43]</sup> (2019)               | CNI rat | ADSCs                               | ICI                             | -                   | 4 weeks                 | 1 x 10 <sup>6</sup>   | CNS | nNOS,Smooth muscle /collagen ratio                                          |
| Ge et al. <sup>[44]</sup> (2019)                 | CNI rat | ADSCs                               | ICI                             | -                   | 4 weeks                 | 1 x 10 <sup>6</sup>   | CNS | NGF,NT-3,S100 $\beta$ ,P75,transcription-3                                  |
| Chen et al. <sup>[45]</sup> (2019)               | CNI rat | iMSC and ADSCs labeled with PKH-67  | ICI                             | -                   | 4 weeks                 | 1 x 10 <sup>6</sup>   | CNS | nNOS, vWF,eNOS, SMA,Desmin,S100 $\beta$ ,caspase-3                          |
| Yang et al. <sup>[46]</sup> (2020)               | CNI rat | ADSCs                               | around the MPG                  | VEGF and GDNF       | 2 weeks                 | 1.5 x 10 <sup>6</sup> | CNS | Neurofilament-H,nNOS ,Desmin, HIF-1 $\alpha$ ,RECA-1,VEGF,GDNF,S100 $\beta$ |
| Gu et al. <sup>[47]</sup> (2020)                 | CNI rat | PSCs labeled withmKATE-renLUC       | ICI                             | -                   | 1, 6, and 12 weeks      | 2.5 x 10 <sup>7</sup> | CNS | nNOS,f desmin,RECA-1,eNOS                                                   |
| Yang et al. <sup>[48]</sup> (2020)               | CNI rat | ADSCs                               | ICI,CVI,PPI                     | BDNF                | 4 weeks                 | 1 x 10 <sup>6</sup>   | CNS | nNOS                                                                        |

|                                     |         |                                     |                |                                              |                   |                                    |     |                                                                 |
|-------------------------------------|---------|-------------------------------------|----------------|----------------------------------------------|-------------------|------------------------------------|-----|-----------------------------------------------------------------|
| Chen et al. <sup>[49]</sup> (2021)  | CNI rat | ADSCs labeled with Edu              | ICI            | -                                            | 4 weeks           | $1 \times 10^6$ or $2 \times 10^6$ | CNS | nNOS,smooth muscle/collagen ratio                               |
| Zheng et al. <sup>[50]</sup> (2020) | CNI rat | ADSCs                               | ICI            | -                                            | -                 | $5 \times 10^5$                    | CNS | S100,GFAP,P75,nNOS, $\beta$ -actin                              |
| Zou er al. <sup>[51]</sup> (2021)   | CNI rat | MDSCs labeled with GFP              | ICI            | miRNA-126                                    | 4 weeks           | $1 \times 10^6$                    | CNS | CD31,vWF,VEGF,IRS1,KLF10                                        |
| Zheng et al. <sup>[52]</sup> (2021) | CNI rat | ADSCs labeled with CM-Dil           | ICI or CVI     | -                                            | 1,2 and 4 weeks   | $1 \times 10^6$                    | CNS | SMA,nNOS                                                        |
| Wu et al. <sup>[53]</sup> (2021)    | CNI rat | hGMSCs                              | around the MPG | -                                            | 2 weeks           | $1 \times 10^6$                    | CNS | nNOS, $\alpha$ -SMA,eNOS,NGF,MBP                                |
| Kim et al. <sup>[54]</sup> (2021)   | CNI rat | BMSCs                               | around the CNI | nanofibrous scaffolds                        | 2 and 4 weeks     | $1 \times 10^6$                    | CNS | NF, MAP2, MBP,peripherin,vWF,SMA,NF                             |
| Jung er al. <sup>[55]</sup> (2021)  | CNI rat | BMSCs labeled with PKH-67           | around the CNI | Oxygen carrier loaded hollow micro particles | 1, 2, and 4 weeks | $1 \times 10^6$                    | CNS | a-SMA, nNOS, eNOS,M3, cGMP                                      |
| Ti et al. <sup>[56]</sup> (2022)    | CNI rat | ADSCs or CBMSCs labeled with PKH-26 | ICI            | -                                            | 4 and 12weeks     | $1 \times 10^6$                    | CNS | nNOS, $\alpha$ -SMA,CD31,NT4,VEGF,MMP 1,MMP 3                   |
| Zhang et al. <sup>[57]</sup> (2022) | CNI rat | ADSCs labeled with PKH-67           | ICI            | lipopolysaccharide                           | 2 weeks           | $1 \times 10^6$                    | CNS | SMA,desmin,MBP,HGF, fibronectin,TGF- $\beta$ 1                  |
| He et al. <sup>[58]</sup> (2022)    | CNI rat | ADSCs                               | ICI            | VEGF&Smad7                                   | 4 weeks           | $1 \times 10^6$                    | CNS | TGF- $\beta$ 1, $\alpha$ -SMA,nNOS,RhoA/ROCK, $\alpha$ -tubulin |
| Shao et al. <sup>[59]</sup> (2022)  | CNI rat | ADSCs labeled with PKH-26           | ICI            | an EPO-loaded multifunctional hydrogel       | 4 weeks           | $1 \times 10^6$                    | CNS | $\alpha$ -SMA,eNOS,nNOS,Caspase-3,BAX,Bcl-2,GAPDH, GFAP, Tuj1   |

Cavernous nerve injury=CNI; Embryonic stem cells=ESC; green fluorescent protein=GFP; Intracorporal injection=ICI; major pelvic ganglion=MPG; Cavernosal nerve electrostimulation=CNS; Nitric oxide synthase=NOS; Intracavernosal pressure =ICP; Mean arterial pressure=MAP; green fluorescence protein=GFP; brain-derived neurotrophic factor=BDNF; muscle-derived stem cells= MDSC; Bilateral cavernous nerve ablation=BCNA; Bone marrow mononuclear cell =BMMNC; Neuronal nitric oxide synthase=nNOS; Endothelial nitric oxide synthase=eNOS; Adipose tissue-derived stem cells=ADSCs; Smooth muscle actin= SMA; fibroblast growth factor=FGF; vascular endothelial growth factor=VEGF; Nerve growth factor=NGF; insulin-like growth factor=IGF; cyclic guanosine monophosphate=cGMP; stromal cell-derived factor-1=SDF-1; Bone marrow-derived mesenchymal stem cells=BMSCs; Src homology region 2-containing protein tyrosine phosphatase=SHP-2; muscle-derived stem cells=MDSC; von Willebrand factor=vWF; urine-derived stem cells=USCs; pigment epithelium-derived factor=PEDF;stromal vascular fraction=SVF; Neurofilament=NF; vascular endothelial growth factor=VEGF; periprostatic implantation=PPI; testis-derived stem cells=HTSC; human nuclear antigen=HNA; intraperitoneal injection=IPI; filamentous actin=F-actin, autologous stromal vascular fraction =SVF; von Willebrand factor=vWF; pigment epithelium-derived factor=PEDF; glial fibrillary acidic protein=GFAP; caudal vein injection = CVI; insulin receptor substrate 1=IRS1; Krüppel-like factor=KLF10; periprostatic injection =PPI; oplacental stem cells =PSCs; muscarinicacetylcholine receptor 3=M3; cyclic guanosine monophosphatemonomeric= cGMP;Katushka far red fluorescent protein= mKATE; endothelial cell antigen-1 =RECA-1; human gingiva-derived MSCs =hGMSCs; , nerve growth factor =NGF; myelin basic protein =MBP;

## References:

- [1]. Bochinski, D., et al., The effect of neural embryonic stem cell therapy in a rat model of cavernosal nerve injury. *BJU Int*, 2004. 94(6): p. 904-9.
- [2]. Kim, Y., et al., Injection of skeletal muscle-derived cells into the penis improves erectile function. *Int J Impot Res*, 2006. 18(4): p. 329-34.
- [3]. Fall, P.A., et al., Apoptosis and effects of intracavernous bone marrow cell injection in a rat model of postprostatectomy erectile dysfunction. *Eur Urol*, 2009. 56(4): p. 716-25.
- [4]. Albersen, M., et al., Injections of adipose tissue-derived stem cells and stem cell lysate improve recovery of erectile function in a rat model of cavernous nerve injury. *J Sex Med*, 2010. 7(10): p. 3331-40.
- [5]. Kendirci, M., et al., Transplantation of nonhematopoietic adult bone marrow stem/progenitor cells isolated by p75 nerve growth factor receptor into the penis rescues erectile function in a rat model of cavernous nerve injury. *J Urol*, 2010. 184(4): p. 1560-6.
- [6]. Lin, G., et al., Tracking intracavernously injected adipose-derived stem cells to bone marrow. *Int J Impot Res*, 2011. 23(6): p. 268-75.
- [7]. Lin, G., et al., Cavernous nerve repair with allogenic adipose matrix and autologous adipose-derived stem cells. *Urology*, 2011. 77(6): p. 1509.e1-8.
- [8]. Woo, J.C., et al., Transplantation of muscle-derived stem cells into the corpus cavernosum restores erectile function in a rat model of cavernous nerve injury. *Korean J Urol*, 2011. 52(5): p. 359-63.
- [9]. Fandel, T.M., et al., Recruitment of intracavernously injected adipose-derived stem cells to the major pelvic ganglion improves erectile function in a rat model of cavernous nerve injury. *Eur Urol*, 2012. 61(1): p. 201-10.
- [10]. Kim, S.J., et al., Effect of mesenchymal stem cells associated to matrixen on the erectile function in the rat model with bilateral cavernous nerve crushing injury. *Int Braz J Urol*, 2012. 38(6): p. 833-41.
- [11]. Kim, S.J., et al., Synergistic effect of mesenchymal stem cells infected with recombinant adenovirus expressing human BDNF on erectile function in a rat model of cavernous nerve injury. *Korean J Urol*, 2012. 53(10): p. 726-32.
- [12]. Kovanecz, I., et al., Separate or combined treatments with daily sildenafil, molsidomine, or muscle-derived stem cells prevent erectile dysfunction in a rat model of cavernosal nerve damage. *J Sex Med*, 2012. 9(11): p. 2814-26.
- [13]. Piao, S., et al., Therapeutic effect of adipose-derived stem cells and BDNF-immobilized PLGA membrane in a rat model of cavernous nerve injury. *J Sex Med*, 2012. 9(8): p. 1968-79.
- [14]. Qiu, X., et al., Effects of intravenous injection of adipose-derived stem cells in a rat model of radiation therapy-induced erectile dysfunction. *J Sex Med*, 2012. 9(7): p. 1834-41.
- [15]. Qiu, X., et al., Both immediate and delayed intracavernous injection of autologous adipose-derived stromal vascular fraction enhances recovery of erectile function in a rat model of cavernous nerve injury. *Eur Urol*, 2012. 62(4): p. 720-7.
- [16]. Jeong, H.H., et al., Combined therapeutic effect of udenafil and adipose-derived stem cell (ADSC)/brain-derived neurotrophic factor (BDNF)-membrane system in a rat model of cavernous nerve injury. *Urology*, 2013. 81(5): p. 1108.e7-14.
- [17]. You, D., et al., Comparative analysis of periprostatic implantation and intracavernosal injection of human adipose tissue-derived stem cells for erectile function recovery in a rat model of cavernous nerve injury. *Prostate*, 2013. 73(3): p. 278-86.
- [18]. You, D., et al., Periprostatic implantation of human bone marrow-derived mesenchymal stem cells potentiates recovery of erectile function by intracavernosal injection in a rat model of cavernous nerve injury. *Urology*, 2013. 81(1): p. 104-10.
- [19]. Kim, I.G., et al., Effect of an adipose-derived stem cell and nerve growth factor-incorporated hydrogel on recovery of erectile function in a rat model of cavernous nerve injury. *Tissue Eng Part A*, 2013. 19(1-2): p. 14-23.
- [20]. Choi, W.Y., et al., Isolation and characterization of novel, highly proliferative human CD34/CD73-double-positive testis-derived stem cells for cell therapy. *Stem Cells Dev*, 2013. 22(15): p. 2158-73.
- [21]. Ying, C., et al., Effects of intracavernous injection of adipose-derived stem cells on cavernous nerve regeneration in a rat model. *Cell Mol Neurobiol*, 2013. 33(2): p. 233-40.
- [22]. Ying, C., et al., Erectile function restoration after repair of resected cavernous nerves by adipose-derived stem cells combined with autologous vein graft in rats. *Cell Mol Neurobiol*, 2014. 34(3): p. 393-402.
- [23]. Miyamoto, K., et al., Rat cavernous nerve reconstruction with CD133+ cells derived from human bone marrow. *J Sex Med*, 2014. 11(5): p. 1148-58.
- [24]. Mangir, N., et al., Mesenchymal stem cell therapy in treatment of erectile dysfunction: autologous or allogeneic cell sources? *Int J Urol*, 2014. 21(12): p. 1280-5.
- [25]. Lee, S.H., et al., Combined effects of brain-derived neurotrophic factor immobilized poly-lactic-co-glycolic acid membrane with human adipose-derived stem cells and basic fibroblast growth factor hydrogel on recovery of erectile dysfunction. *Tissue Eng Part A*, 2014. 20(17-18): p. 2446-54.
- [26]. Ryu, J.K., et al., Intracavernous delivery of clonal mesenchymal stem cells restores erectile function in a mouse model of cavernous nerve injury. *J Sex Med*, 2014. 11(2): p. 411-23.
- [27]. Bae, J.H., et al., Comparison between subcutaneous injection of basic fibroblast growth factor-hydrogel and intracavernous injection of adipose-derived stem cells in a rat model of cavernous nerve injury. *Urology*, 2014. 84(5): p. 1248.e1-7.
- [28]. Xu, Y., et al., Therapeutic potential of adipose-derived stem cells-based micro-tissues in a rat model of postprostatectomy erectile dysfunction. *J Sex Med*, 2014. 11(10): p. 2439-48.
- [29]. Yang, R., et al., Adipose-derived stem cells ameliorate erectile dysfunction after cavernous nerve cryoinjury. *Andrology*, 2015. 3(4): p. 694-701.
- [30]. Takayanagi, A., et al., Intravenous Preload of Mesenchymal Stem Cells Rescues Erectile Function in a Rat Model of Cavernous Nerve Injury. *J Sex Med*, 2015. 12(8): p. 1713-21.
- [31]. You, D., et al., Comparative study of autologous stromal vascular fraction and adipose-derived stem cells for erectile function recovery in a rat model of cavernous nerve injury. *Stem Cells Transl Med*, 2015. 4(4): p. 351-8.
- [32]. Zhu, J.Q., et al., Therapeutic potential of human umbilical cord blood mesenchymal stem cells on erectile function in rats with cavernous nerve injury. *Biotechnol Lett*, 2015. 37(7): p. 1515-25.
- [33]. Chen, X., et al., Neurotrophic Effect of Adipose Tissue-Derived Stem Cells on Erectile Function Recovery by Pigment Epithelium-Derived Factor Secretion in a Rat Model of Cavernous Nerve Injury. *Stem Cells Int*, 2016. 2016: p. 5161248.

- [34]. Levy, J.A., et al., Determining the Feasibility of Managing Erectile Dysfunction in Humans With Placental-Derived Stem Cells. *J Am Osteopath Assoc*, 2016. 116(1): p. e1-5.
- [35]. Yang, Q., et al., Transplantation of Human Urine-Derived Stem Cells Transfected with Pigment Epithelium-Derived Factor to Protect Erectile Function in a Rat Model of Cavernous Nerve Injury. *Cell Transplant*, 2016. 25(11): p. 1987-2001.
- [36]. Lin, H., et al., Nanoparticle Improved Stem Cell Therapy for Erectile Dysfunction in a Rat Model of Cavernous Nerve Injury. *J Urol*, 2016. 195(3): p. 788-95.
- [37]. Martínez-Salamanca, J.I., et al., Dual Strategy With Oral Phosphodiesterase Type 5 Inhibition and Intracavernosal Implantation of Mesenchymal Stem Cells Is Superior to Individual Approaches in the Recovery of Erectile and Cavernosal Functions After Cavernous Nerve Injury in Rats. *J Sex Med*, 2016. 13(1): p. 1-11.
- [38]. Wang, H., et al., LncRNA MIAT facilitated BM-MSCs differentiation into endothelial cells and restored erectile dysfunction via targeting miR-200a in a rat model of erectile dysfunction. *Eur J Cell Biol*, 2018. 97(3): p. 180-189.
- [39]. Wu, H., et al., Nanotechnology-assisted adipose-derived stem cell (ADSC) therapy for erectile dysfunction of cavernous nerve injury: In vivo cell tracking, optimized injection dosage, and functional evaluation. *Asian J Androl*, 2018. 20(5): p. 442-447.
- [40]. Zheng, T., et al., Icariside II Promotes the Differentiation of Adipose Tissue-Derived Stem Cells to Schwann Cells to Preserve Erectile Function after Cavernous Nerve Injury. *Mol Cells*, 2018. 41(6): p. 553-561.
- [41]. Matsuda, Y., et al., Intravenous Infusion of Bone Marrow-Derived Mesenchymal Stem Cells Reduces Erectile Dysfunction Following Cavernous Nerve Injury in Rats. *Sex Med*, 2018. 6(1): p. 49-57.
- [42]. Fang, J.F., et al., Combined Transplantation of Mesenchymal Stem Cells and Endothelial Progenitor Cells Restores Cavernous Nerve Injury-Related Erectile Dysfunction. *J Sex Med*, 2018. 15(3): p. 284-295.
- [43]. Ying, C.C., et al., Neural-like cells from adipose-derived stem cells for cavernous nerve injury in rats. *Neural Regen Res*, 2019. 14(6): p. 1085-1090.
- [44]. Ge, P., Y. Guo and J. Shen, IcarisideII facilitates the differentiation of ADSCs to SCs via let-7i/STAT3 axis to preserve erectile function. *Biol Res*, 2019. 52(1): p. 54.
- [45]. Chen, Z., et al., Transplantation of induced pluripotent stem cell-derived mesenchymal stem cells improved erectile dysfunction induced by cavernous nerve injury. *Theranostics*, 2019. 9(22): p. 6354-6368.
- [46]. Yang, W., et al., Co-overexpression of VEGF and GDNF in adipose-derived stem cells optimizes therapeutic effect in neurogenic erectile dysfunction model. *Cell Prolif*, 2020. 53(2): p. e12756.
- [47]. Gu, X., et al., Dynamic Changes in Erectile Function and Histological Architecture After Intracorporal Injection of Human Placental Stem Cells in a Pelvic Neurovascular Injury Rat Model. *J Sex Med*, 2020. 17(3): p. 400-411.
- [48]. Yang, M., et al., Adipose-derived stem cells modified by BDNF gene rescue erectile dysfunction after cavernous nerve injury. *Neural Regen Res*, 2020. 15(1): p. 120-127.
- [49]. Chen, X., et al., Comparative study of different transplantation methods of adipose tissue-derived stem cells in the treatment of erectile dysfunction caused by cavernous nerve injury. *Andrologia*, 2021. 53(4): p. e13950.
- [50]. Zheng, T., et al., Icariside II facilitates the differentiation of ADSCs to schwann cells and restores erectile dysfunction through regulation of miR-33/GDNF axis. *Biomed Pharmacother*, 2020. 125: p. 109888.
- [51]. Zou, Z., et al., MicroRNA-126 engineered muscle-derived stem cells attenuates cavernosa injury-induced erectile dysfunction in rats. *Aging (Albany NY)*, 2021. 13(10): p. 14399-14415.
- [52]. Zheng, H., et al., Effects of Cells Self-aggregation in the Treatment of Neurogenic Erectile Dysfunction With Traditional Single Cell Suspension of Adipose-derived Stem Cells. *Urology*, 2021. 158: p. 102-109.
- [53]. Wu, J., et al., Transplantation of Human Gingiva-Derived Mesenchymal Stem Cells Ameliorates Neurotic Erectile Dysfunction in a Rat Model. *Front Bioeng Biotechnol*, 2021. 9: p. 630076.
- [54]. Kim, J.H., et al., Improvement of damaged cavernosa followed by neuron-like differentiation at injured cavernous nerve after transplantation of stem cells seeded on the PLA nanofiber in rats with cavernous nerve injury. *Mol Biol Rep*, 2021. 48(4): p. 3549-3559.
- [55]. Jung, A.R., et al., Stem Cell/Oxygen-Releasing Microparticle Enhances Erectile Function in a Cavernous Nerve Injury Model. *Tissue Eng Part A*, 2021. 27(1-2): p. 50-62.
- [56]. Ti, Y., et al., Comparison of the therapeutic effects of human umbilical cord blood-derived mesenchymal stem cells and adipose-derived stem cells on erectile dysfunction in a rat model of bilateral cavernous nerve injury. *Front Bioeng Biotechnol*, 2022. 10: p. 1019063.
- [57]. Zhang, Z., et al., Lipopolysaccharide-preconditioned allogeneic adipose-derived stem cells improve erectile function in a rat model of bilateral cavernous nerve injury. *Basic Clin Androl*, 2022. 32(1): p. 5.
- [58]. He, L., et al., Co-overexpression of VEGF and Smad7 improved the therapeutic effects of adipose-derived stem cells on neurogenic erectile dysfunction in the rat model. *Andrologia*, 2022. 54(10): p. e14538.
- [59]. Shao, J., et al., An EPO-loaded multifunctional hydrogel synergizing with adipose-derived stem cells restores neurogenic erectile function via enhancing nerve regeneration and penile rehabilitation. *Bioeng Transl Med*, 2022. 7(3): p. e10319.

Table 2 Summarizes stem cell studies aimed at DMED

| Author (year)                          | animal model | stem cell type            | Transplant method | transfection                   | Follow-up time            | number                                                                                           | Erectile function | Histological\ molecular                                                               |
|----------------------------------------|--------------|---------------------------|-------------------|--------------------------------|---------------------------|--------------------------------------------------------------------------------------------------|-------------------|---------------------------------------------------------------------------------------|
| Garcia et al <sup>[1]</sup> (2010)     | DMED rats    | ADSCs                     | ICI               | -                              | three weeks               | $1 \times 10^6$                                                                                  | CNS               | nNOS,RECA                                                                             |
| Qiu et al <sup>[2]</sup> (2011)        | DMED rats    | BMSCs labeled with CM-DiI | ICI               | -                              | four weeks                | $4 \times 10^5$                                                                                  | CNS               | $\alpha$ -SMA,vWF,CD31, calponin,                                                     |
| Nishimatsu et al <sup>[3]</sup> (2012) | DMED rats    | ADSCs labeled with PKH-26 | ICI               | -                              | four weeks                | $5 \times 10^5$                                                                                  | CNS               | eNOS,VE-cadherin                                                                      |
| Sun et al <sup>[4]</sup> (2012)        | DMED rats    | BMSCs labeled with CM-DiI | ICI               | -                              | four weeks                | $5 \times 10^6$                                                                                  | CNS               | nNOS,NF,VEGF,NGF,BDNF                                                                 |
| Qiu et al <sup>[5]</sup> (2012)        | DMED rats    | MSCs labeled with CM-DiI  | ICI               | VEGF164                        | four weeks                | $5 \times 10^6$                                                                                  | CNS               | VEGF                                                                                  |
| Liu et al <sup>[6]</sup> (2013)        | DMED rats    | ADSCs labeled with GFP    | ICI               | VEGF                           | one and four weeks        | $1 \times 10^6$                                                                                  | CNS               | VEGF,eNOS,vWF,CD31,smooth muscle/collagen ratio                                       |
| He et al <sup>[7]</sup> (2014)         | DMED rats    | BMSCs                     | ICI               | KCNMA1                         | four weeks                | $1 \times 10^6$                                                                                  | CNS               | KCNMA1                                                                                |
| Liu et al <sup>[8]</sup> (2015)        | DMED rats    | ADSCs labeled with GFP    | ICI               | HGF                            | one months                | $2 \times 10^6$                                                                                  | CNS               | HGF,eNOS,PECAM-1,SMA,P-Akt, Akt,Bcl-2,P-Smad2,Smad2,Cleaved-caspase3,Bcl-xl,TGIF      |
| Wang et al <sup>[9]</sup> (2015)       | DMED rats    | ADSCs labeled with CM-DiI | ICI               | -                              | four weeks                | $1 \times 10^6$                                                                                  | CNS               | VEGF,CD31 ,bFGF, BDNF,GDNF,SDF-1,CXCR4,vWF,nNOS , $\alpha$ -SMA,HIF-1 $\alpha$ ,Ang-1 |
| Ryu et al <sup>[10]</sup> (2016)       | DMED rats    | MSCs                      | ICI               | -                              | two weeks                 | $3 \times 10^5$                                                                                  | CNS               | eNOS,nNOS,PECAM-1, $\alpha$ -SMA , NF,                                                |
| Lu et al <sup>[11]</sup> (2016)        | DMED rats    | ADSCs labeled with GFP    | ICI               | PEDF                           | two weeks                 | $1 \times 10^6$                                                                                  | CNS               | BDNF,NGF,nNOS, $\beta$ -III tubulin,cGMP                                              |
| Zhou et al <sup>[12]</sup> (2016)      | DMED rats    | ADSCs labeled with CM-DiI | ICI               | -                              | four weeks                | $1 \times 10^6$                                                                                  | CNS               | $\alpha$ -SMA,vWF,VEGF ,nNOS,AGEs,RAGE,NF- $\kappa$ B                                 |
| Sun et al <sup>[13]</sup> (2017)       | DMED rats    | BMSCs                     | ICI               | Bcl-2                          | three days and four weeks | $5 \times 10^6$                                                                                  | CNS               | Bcl-2                                                                                 |
| Wang et al <sup>[14]</sup> (2017)      | DMED rats    | MSCs                      | ICI               | -                              | four weeks                | $1 \times 10^6$                                                                                  | CNS               | vWF, $\alpha$ -SMA,p-STAT3,p-Akt,Csp3,Bax,Bcl-2                                       |
| Sun et al <sup>[15]</sup> (2018)       | DMED rats    | BMSCs                     | ICI               | -                              | zero,two,four ,seven days | $5 \times 10^6$                                                                                  | CNS               | MEG3,FOXM1,VEGF                                                                       |
| Zhu et al <sup>[16]</sup> (2018)       | DMED rats    | MSCs labeled with CM-DiI  | ICI               | low-energy shock waves         | eight weeks               | $1 \times 10^6$                                                                                  | CNS               | VEGF,SDF-1,PECAM,NGF,PDNF,nNOS,eNOS,pAKT,AKT, $\beta$ -actin,PARP,LC-3                |
| Ouyang et al <sup>[17]</sup> (2019)    | DMED rats    | USCs                      | ICI               | -                              | four weeks                | $2 \times 10^5$                                                                                  | CNS               | nNOS,CD31,eNOS,cell/collagen ratio.                                                   |
| Zhang et al <sup>[18]</sup> (2019)     | DMED rats    | USCs                      | ICI               | -                              | four weeks                | $1 \times 10^6$                                                                                  | CNS               | LC3-II,LC3-I,PCNA,Beclin1,p62,CD31, eNOS,VEGFRA,VEGFR2                                |
| Zhang et al <sup>[19]</sup> (2019)     | DMED rats    | ADSCs                     | ICI               | iNOS                           | two weeks                 | $5 \times 10^5$                                                                                  | CNS               | NO,cGMP,TGF- $\beta$ 1, collagen I, collagen IV,smooth muscle                         |
| Chen et al <sup>[20]</sup> (2019)      | DMED rats    | ADSCs, BMSCs              | ICI               | -                              | four weeks                | BMSC: $1 \times 10^7$ ;ADSC: $1 \times 10^6$                                                     | CNS               | eNOS                                                                                  |
| Zhang et al <sup>[21]</sup> (2019)     | DMED rats    | ADSCs labeled with EdU    | ICI               | myocardin                      | one and three weeks       | $1 \times 10^6$                                                                                  | CNS               | $\alpha$ -SMA,calponin,collagen I,Bcl-2, Bax, cleaved-caspase3                        |
| Yang et al <sup>[22]</sup> (2020)      | DMED rats    | ADSCs, EPCs               | ICI               | -                              | four weeks                | ADSCs: $1 \times 10^6$ ,EPCs: $1 \times 10^6$ ;<br>ADSCs/EPCs: $0.5 \times 10^6/0.5 \times 10^6$ | CNS               | CD31,vWF,KDR,VEGF,SDF-1, eNOS                                                         |
| Yang et al <sup>[23]</sup> (2020)      | DMED rats    | ADSCs                     | ICI               | phosphodiesterase type 5 siRNA | one and two weeks         | $5 \times 10^5$                                                                                  | CNS               | PDE5, IGF-1,VEGF, smooth muscle/collagen ratio                                        |
| Wang et al <sup>[24]</sup> (2020)      | DMED rats    | MSCs labeled with CM-DiI  | ICI               | -                              | two weeks                 | $1 \times 10^6$                                                                                  | CNS               | $\alpha$ -SMA,vWF,Nrf2,HO-1,Bax,Caspase3,Cleaved-Caspase3,Bcl-2,Beclin1,62,LC3II/I    |
| Sun et al <sup>[25]</sup> (2020)       | DMED rats    | BMSCs                     | ICI               | LncRNA MALAT1                  | -                         | $5 \times 10^6$                                                                                  | CNS               | VEGF,MALAT1,vWF,VE-cadherin,eNOS, NO level, cGMP, smooth muscle-to-collagen ratio     |
| Zhou et al <sup>[26]</sup> (2021)      | DMED rats    | ADSCs                     | ICI               | Knockdown of miR- 423-5p       | eight weeks               | $1 \times 10^6$                                                                                  | CNS               | eNOS,VEGF                                                                             |
| Shin et al <sup>[27]</sup> (2021)      | DMED rats    | MSCs                      | ICI               | SDF-1,ESWT                     | four weeks eight weeks    | $1 \times 10^6$                                                                                  | CNS               | $\alpha$ -SMA,SDF-1,nNOS                                                              |
| Liu et al <sup>[28]</sup> (2022)       | DMED rats    | ADSCs                     | ICI               | LIPUS                          | two and four weeks        | $1 \times 10^6$                                                                                  | CNS               | eNOS,vWF,CXCL12,FGF2,VEGF,ERK,NGF,HGF,IGF1,                                           |

|                                     |           |         |            |         |            |                                      |     |                                                                                           |
|-------------------------------------|-----------|---------|------------|---------|------------|--------------------------------------|-----|-------------------------------------------------------------------------------------------|
| Feng et al <sup>[29]</sup> (2022)   | DMED rats | UC-MSCs | ICI and VI | -       | four weeks | 1x10 <sup>6</sup>                    | CNS | cGMP,MDA,SOD,Fe,eNOS,nNOS,ROS,GPX4,ACSL 4,smooth muscle to collagen,SLC7A11,LPCAT3,ALOX15 |
| Mukti et al <sup>[30]</sup> (2022)  | DMED rats | UC-MSCs | ICI        | -       | -          | 1x10 <sup>6</sup> ;3x10 <sup>6</sup> | -   | TGF-β,α-SMA,collagen                                                                      |
| Wang et al <sup>[31]</sup> (2022)   | DMED rats | UC-MSCs | ICI        | -       | four weeks | 1 × 10 <sup>6</sup>                  | CNS | TLR4,eNOS,VEGF,Smooth muscle/collagen ratio                                               |
| Luo et al <sup>[32]</sup> (2022)    | DMED rats | ADSCs   | ICI        | shNLRP3 | four weeks | 1 × 10 <sup>6</sup>                  | CNS | NLRP 3,SDF-1,VEGFA,FGF 2                                                                  |
| Quaade et al <sup>[33]</sup> (2022) | DMED rats | ADSCs   | ICI        | -       | four weeks | 1 × 10 <sup>6</sup>                  | CNS | Procollagen1,PACAM-1,α-SMA、 eNOS、 nNOS                                                    |

platelet endothelial cell adhesion molecule-1=PECAM-1; transcription co-inhibition factor=TGIF;vascular endothelial cell=VEC;pigment epithelium-derived factor =PEDF;B cell lymphoma-2=Bcl-2;advanced glycation end products=AGEs;rabbit anti-receptor for AGE =RAGE;Light chain 3=LC3;Poly-ADP-ribose polymerase=PARP;Inducible nitric oxide synthase =iNOS;metastasis-associated lung adenocarcinoma transcript 1=MALAT1;malondialdehyde=MDA;superoxide dismutase=SOD;Umbilical Cord-Derived Mesenchymal Stem Cells=UC-MSCs;TLR4=Toll-like receptor 4;ROS=reactive oxygen species; lipopolysaccharide-inducible=LIX; chemokine=CXC; TIMP metalloproteinase inhibitor 1;TIMP-1; interleukin-1α =IL-1α;macrophage inflammatory protein 3α=MIP-3α;maternally expressed gene 3=MEG3;

## References:

- [1]. Garcia, M.M., et al., Treatment of erectile dysfunction in the obese type 2 diabetic ZDF rat with adipose tissue-derived stem cells. *J Sex Med*, 2010. 7(1 Pt 1): p. 89-98.
- [2]. Qiu, X., et al., Intracavernous transplantation of bone marrow-derived mesenchymal stem cells restores erectile function of streptozocin-induced diabetic rats. *J Sex Med*, 2011. 8(2): p. 427-36.
- [3]. Nishimatsu, H., et al., Adrenomedullin mediates adipose tissue-derived stem cell-induced restoration of erectile function in diabetic rats. *J Sex Med*, 2012. 9(2): p. 482-93.
- [4]. Sun, C., et al., Neurotrophic effect of bone marrow mesenchymal stem cells for erectile dysfunction in diabetic rats. *Int J Androl*, 2012. 35(4): p. 601-7.
- [5]. Qiu, X., et al., Combined strategy of mesenchymal stem cell injection with vascular endothelial growth factor gene therapy for the treatment of diabetes-associated erectile dysfunction. *J Androl*, 2012. 33(1): p. 37-44.
- [6]. Liu, G., et al., Correction of diabetic erectile dysfunction with adipose derived stem cells modified with the vascular endothelial growth factor gene in a rodent diabetic model. *PLoS One*, 2013. 8(8): p. e72790.
- [7]. He, Y., et al., Transplantation KCNMA1 modified bone marrow-mesenchymal stem cell therapy for diabetes mellitus-induced erectile dysfunction. *Andrologia*, 2014. 46(5): p. 479-86.
- [8]. Liu, T., et al., Hepatocyte growth factor-modified adipose tissue-derived stem cells improve erectile function in streptozotocin-induced diabetic rats. *Growth Factors*, 2015. 33(4): p. 282-9.
- [9]. Wang, X., et al., Hypoxia precondition promotes adipose-derived mesenchymal stem cells based repair of diabetic erectile dysfunction via augmenting angiogenesis and neuroprotection. *PLoS One*, 2015. 10(3): p. e0118951.
- [10]. Ryu, J.K., et al., Intracavernous delivery of clonal mesenchymal stem cells rescues erectile function in the streptozotocin-induced diabetic mouse. *Andrology*, 2016. 4(1): p. 172-84.
- [11]. Lu, J., et al., Beneficial effect of PEDF-transfected ADSCs on erectile dysfunction in a streptozotocin-diabetic rat model. *Cell Tissue Res*, 2016. 366(3): p. 623-637.
- [12]. Zhou, F., et al., Effects of adipose-derived stem cells plus insulin on erectile function in streptozotocin-induced diabetic rats. *Int Urol Nephrol*, 2016. 48(5): p. 657-69.
- [13]. Sun, X., et al., B Cell Lymphoma-2-Modified Bone Marrow-Derived Mesenchymal Stem Cells Transplantation for the Treatment of Diabetes Mellitus-Induced Erectile Dysfunction in a Rat Model. *Urol Int*, 2017. 98(3): p. 358-366.
- [14]. Wang, X., et al., Combination of mesenchymal stem cell injection with icariin for the treatment of diabetes-associated erectile dysfunction. *PLoS One*, 2017. 12(3): p. e0174145.
- [15]. Sun, X., et al., Down-regulation of lncRNA MEG3 promotes endothelial differentiation of bone marrow derived mesenchymal stem cells in repairing erectile dysfunction. *Life Sci*, 2018. 208: p. 246-252.
- [16]. Zhu, G.Q., et al., Efficient Promotion of Autophagy and Angiogenesis Using Mesenchymal Stem Cell Therapy Enhanced by the Low-Energy Shock Waves in the Treatment of Erectile Dysfunction. *Stem Cells Int*, 2018. 2018: p. 1302672.
- [17]. Ouyang, B., et al., Extracellular Vesicles From Human Urine-Derived Stem Cells Ameliorate Erectile Dysfunction in a Diabetic Rat Model by Delivering Proangiogenic MicroRNA. *Sex Med*, 2019. 7(2): p. 241-250.
- [18]. Zhang, C., et al., Transplantation of Human Urine-Derived Stem Cells Ameliorates Erectile Function and Cavernal Endothelial Function by Promoting Autophagy of Corpus Cavernal Endothelial Cells in Diabetic Erectile Dysfunction Rats. *Stem Cells Int*, 2019. 2019: p. 2168709.
- [19]. Zhang, Y., et al., Transplantation of adipose-derived stem cells overexpressing inducible nitric oxide synthase ameliorates diabetes mellitus-induced erectile dysfunction in rats. *PeerJ*, 2019. 7: p. e7507.
- [20]. Chen, S., et al., Comparison of the therapeutic effects of adipose-derived and bone marrow mesenchymal stem cells on erectile dysfunction in diabetic rats. *Int J Mol Med*, 2019. 44(3): p. 1006-1014.
- [21]. Zhang, H.B., et al., In vivo tracking on longer retention of transplanted myocardin gene-modified adipose-derived stem cells to improve erectile dysfunction in diabetic rats. *Stem Cell Res Ther*, 2019. 10(1): p. 208.
- [22]. Yang, Q., et al., Combined Transplantation of Adipose Tissue-Derived Stem Cells and Endothelial Progenitor Cells Improve Diabetic Erectile Dysfunction in a Rat Model. *Stem Cells Int*, 2020. 2020: p. 2154053.
- [23]. Yang, J., et al., Preconditioning of adipose-derived stem cells by phosphodiesterase-5 inhibition enhances therapeutic efficacy against diabetes-induced erectile dysfunction. *Andrology*, 2020. 8(1): p. 231-240.
- [24]. Wang, H., et al., Probucol enhances the therapeutic efficiency of mesenchymal stem cells in the treatment of erectile dysfunction in diabetic rats by prolonging their survival time via Nrf2 pathway. *Stem Cell Res Ther*, 2020. 11(1): p. 302.
- [25]. Sun, X., L. Luo and J. Li, LncRNA MALAT1 facilitates BM-MSCs differentiation into endothelial cells via targeting miR-206/VEGFA axis. *Cell Cycle*, 2020. 19(22): p. 3018-3028.
- [26]. Zhou, J., et al., Knockdown of miR-423-5p simultaneously upgrades the eNOS and VEGFA pathways in ADSCs and improves erectile function in diabetic rats. *J Cell Mol Med*, 2021. 25(20): p. 9796-9804.
- [27]. Shin, D., et al., Extracorporeal shock wave therapy combined with engineered mesenchymal stem cells expressing stromal cell-derived factor-1 can improve erectile dysfunction in streptozotocin-induced diabetic rats. *Transl Androl Urol*, 2021. 10(6): p. 2362-2372.
- [28]. Liu, S., et al., Low-Intensity Pulsed Ultrasound Enhanced Adipose-Derived Stem Cell-Mediated Angiogenesis in the Treatment of Diabetic Erectile Dysfunction through the Piezo-ERK-VEGF Axis. *Stem Cells Int*, 2022. 2022: p. 6202842.
- [29]. Feng, H., et al., Human umbilical cord mesenchymal stem cells ameliorate erectile dysfunction in rats with diabetes mellitus through the attenuation of ferroptosis. *Stem Cell Res Ther*, 2022. 13(1): p. 450.
- [30]. Mukti, A.I., et al., Umbilical Cord-Derived Mesenchymal Stem Cells Improve TGF-beta, alpha-SMA and Collagen on Erectile Dysfunction in Streptozotocin-Induced Diabetic Rats. *Med Arch*, 2022. 76(1): p. 4-11.
- [31]. Wang, S., et al., A study of diabetes-induced erectile dysfunction treated with human umbilical cord mesenchymal stem cells. *Andrologia*, 2022. 54(7): p. e14440.
- [32]. Luo, C., et al., NLRP3 downregulation enhances engraftment and functionality of adipose-derived stem cells to alleviate erectile dysfunction in diabetic rats. *Front Endocrinol (Lausanne)*, 2022. 13: p. 913296.
- [33]. Quaade, M.L., et al., Adipose-Derived Stem Cells from Type 2 Diabetic Rats Retain Positive Effects in a Rat Model of Erectile Dysfunction. *Int J Mol Sci*, 2022. 23(3).
